# Supplementary material for: On the link between bulk and surface properties of mixed ion electron conducting materials Ln0.5Sr0.5Co0.8Fe0.2O3−δ(Ln = La, Pr, Nd)
Source: Royal Society of Chemistry journal article supplement (doi:10.1039/c4ta04760e), 2014-09-30
Supplement: c4ta04760e1.pdf [file c4ta04760e1.pdf]

|                 | LSCF        | PSCF (phase 1) | PSCF (phase 2) | NSCF (phase 1) | NSCF (phase 2) |
|-----------------|-------------|----------------|----------------|----------------|----------------|
| Space group     | $R\bar{3}c$ | $R\bar{3}c$    | Pnma           | $R\bar{3}c$    | Pnma           |
| Weight fraction | 1           | 0.52           | 0.48           | 0.16           | 0.84           |
| $a$ (Å)         | 5.43670(1)  | 5.42139(1)     | 5.39099(3)     | 5.41200(7)     | 5.38121(1)     |
| $b$ (Å)         | 5.43670(1)  | 5.42139(1)     | 7.61885(3)     | 5.41200(7)     | 7.60651(1)     |
| $c$ (Å)         | 13.25555(1) | 13.15816(3)    | 5.43564(2)     | 13.14912(21)   | 5.43092(1)     |
| $\chi^2$        | 4.873       | 5.629          | 5.629          | 4.208          | 4.208          |
| $R_{wp}$        | 14.1%       | 14.2%          | 14.2%          | 10.7%          | 10.7%          |

**Table S1:** Rietveld fit parameters for synchrotron powder XRD of the materials at room temperature.

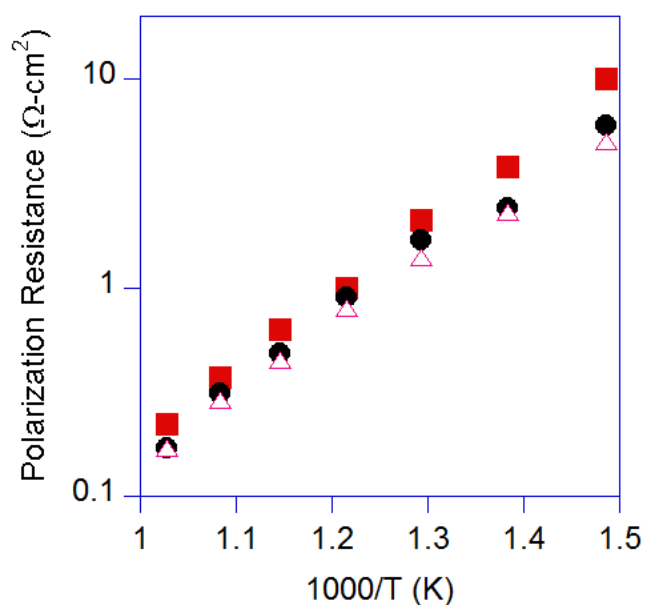

**Figure S1:** Area specific polarization resistance of symmetric cells made from the three materials, as measured by EIS. Silver ink was used as a current collector. Squares represent LSCF, circles PSCF, and open triangles NSCF.
